# Supplementary material for: Mutations in the mitochondrial tryptophanyl‐tRNA synthetase cause growth retardation and progressive leukoencephalopathy
Source: PubMed Central journal article supplement (PMC6565557; doi:10.1002/mgg3.654), 2019-03-28
Supplement: MGG3-7-e654-s003.pdf [file MGG3-7-e654-s003.pdf]

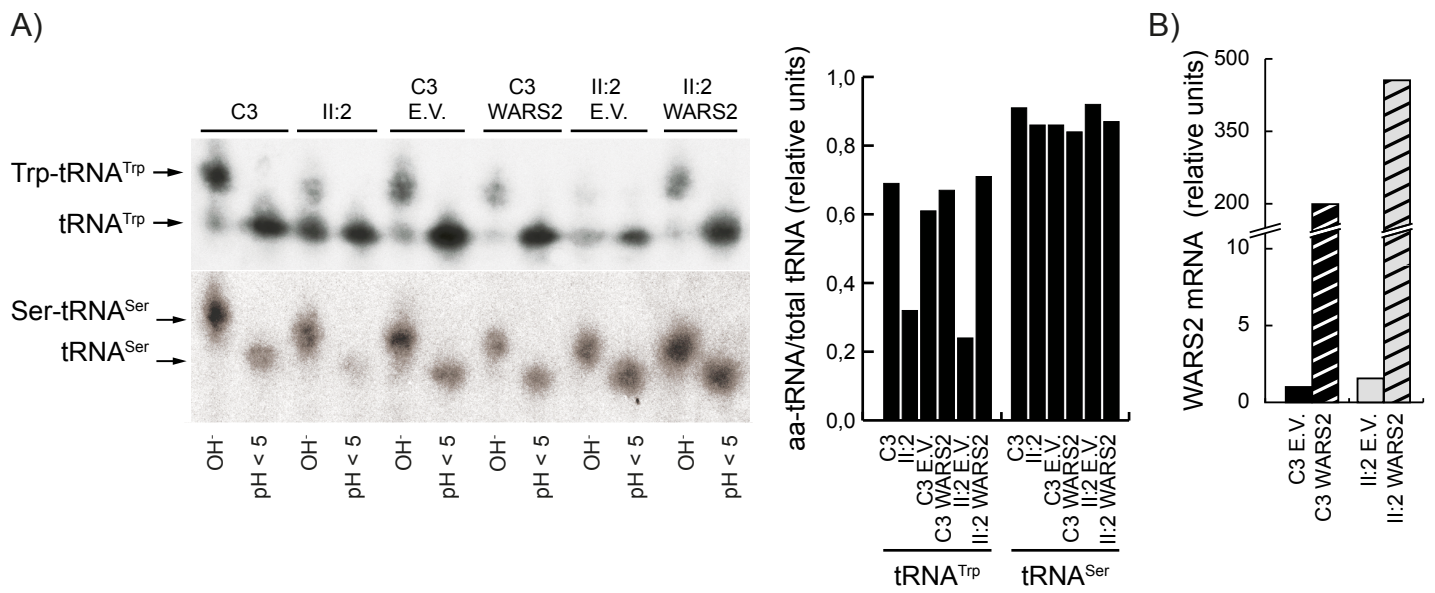

**Figure S3.** Rescue of the aminoacylation defect in NES cells from subject II:2. (A) Left: Representative acidic-urea PAGE on control (C3), and subject II:2 NES cells transfected with empty pIRES-eGFP (E.V.) or overexpressing WARS2 (WARS2), n=3 independent experiments. Aminoacylated tRNAs (Trp-tRNA<sup>Trp</sup>, Ser-tRNA<sup>Ser</sup>), migrate slower, when isolated under acidic (pH < 5) conditions. Uncharged tRNAs (tRNA<sup>Trp</sup>, tRNA<sup>Ser</sup>) migrate as seen under basic (OH<sup>-</sup>). Right: Quantification of (A) under acidic (pH < 5) conditions. (B) qRT-PCR analysis of WARS2 expression in control (C3) and subject II:2 NES cell lines transfected with either empty pIRES-eGFP (E.V.) or overexpressing WARS2 (WARS2).
